# Supplementary material
Source: publisher figshare collection journal article supplement (https://gsajournals.figshare.com/ndownloader/files/19072058)
Supplement: Supplementary file 1 [file 19072058]

Supplementary Information for

**Loss of chondroitin sulfate modification causes inflammation and neurodegeneration in *skt* mice**

Erica L. Macke1, Erika Henningsen1, Erik Jessen1,2, Nicholas A. Zumwalde3, Michael Landowski1, Daniel E. Western1, Wei-Hua Lee1, Che Liu4,5, Nathan P. Gruenke1, Anna-Lisa Doebley1, Samuel Miller1, Bikash Pattnaik6,7,8, Sakae Ikeda1,8, Jenny E. Gumperz3, Akihiro Ikeda1,8

1. Department of Genetics, UW-Madison
2. Department of Biochemistry, UW-Madison
3. Department of Medical Microbiology & Immunology, UW-Madison
4. Institute for Molecular Virology, UW-Madison
5. McArdle Laboratory for Cancer Research, UW-Madison
6. Department of Pediatrics, UW-Madison
7. Department of Ophthalmology and Visual Sciences, UW-Madison
8. McPherson Eye Research Institute, UW-Madison

Corresponding author: Akihiro Ikeda

Email: [aikeda@wisc.edu](mailto:aikeda@wisc.edu)

**This PDF file includes:**

Figs. S1 to S7

Tables S1 to S4


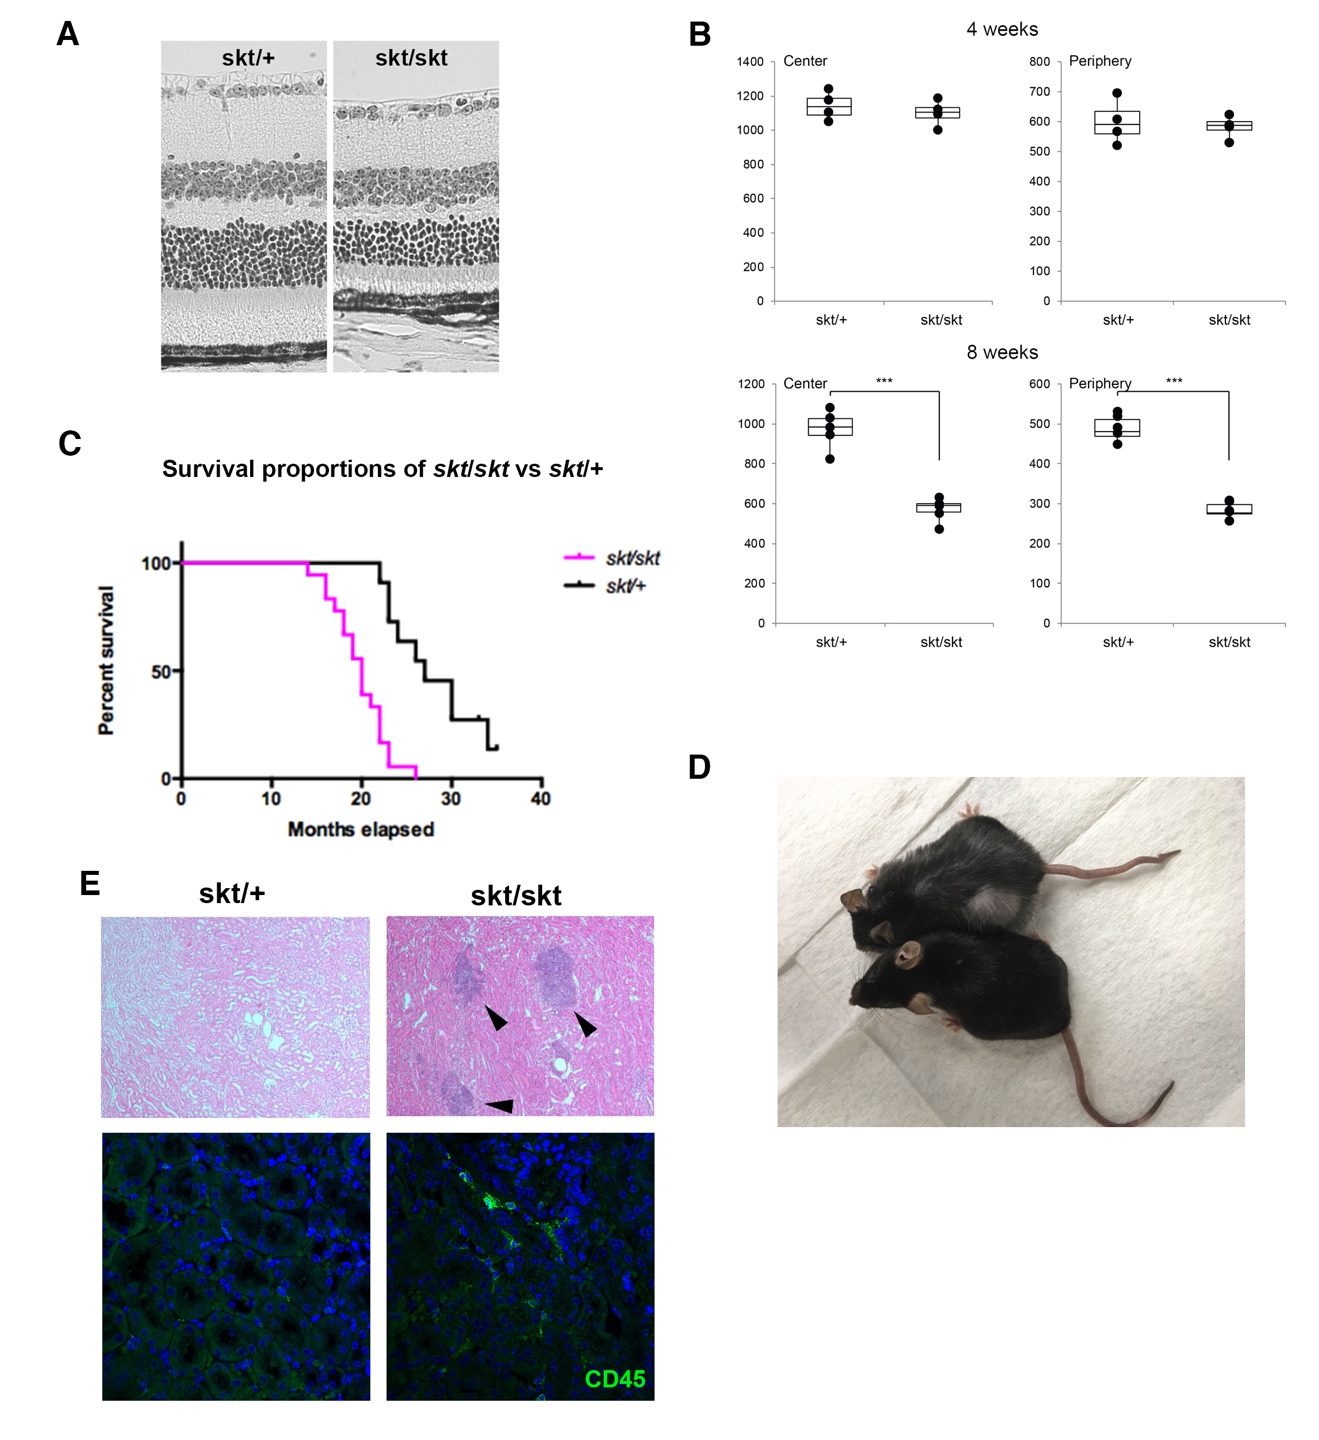


Fig. S1. (A) H&E stained retinal sections from *skt/+* and *skt/skt* mice at 8 weeks of age. (B) Quantification of DAPI-stained photoreceptor cell nuclei in the ONL of *skt/+* and *skt/skt* mice at 4 and 8 weeks of age in the central and peripheral retina. ***P<0.001 (C) Lifespan is reduced in *skt* mice. The median survival is 20 months for *skt* mice (n=18) and 27 months for heterozygous control mice (n=11) (p value < 0.001). (D) Two-year-old *skt* mice (top) exhibit hair loss and hunched posture. (E) H&E stained kidney of *skt/skt* mice shows inflammatory infiltrates (upper panel, arrowheads). CD45-positive inflammatory cells were detected in the *skt/skt* kidney by immunohistochemistry (lower panel).


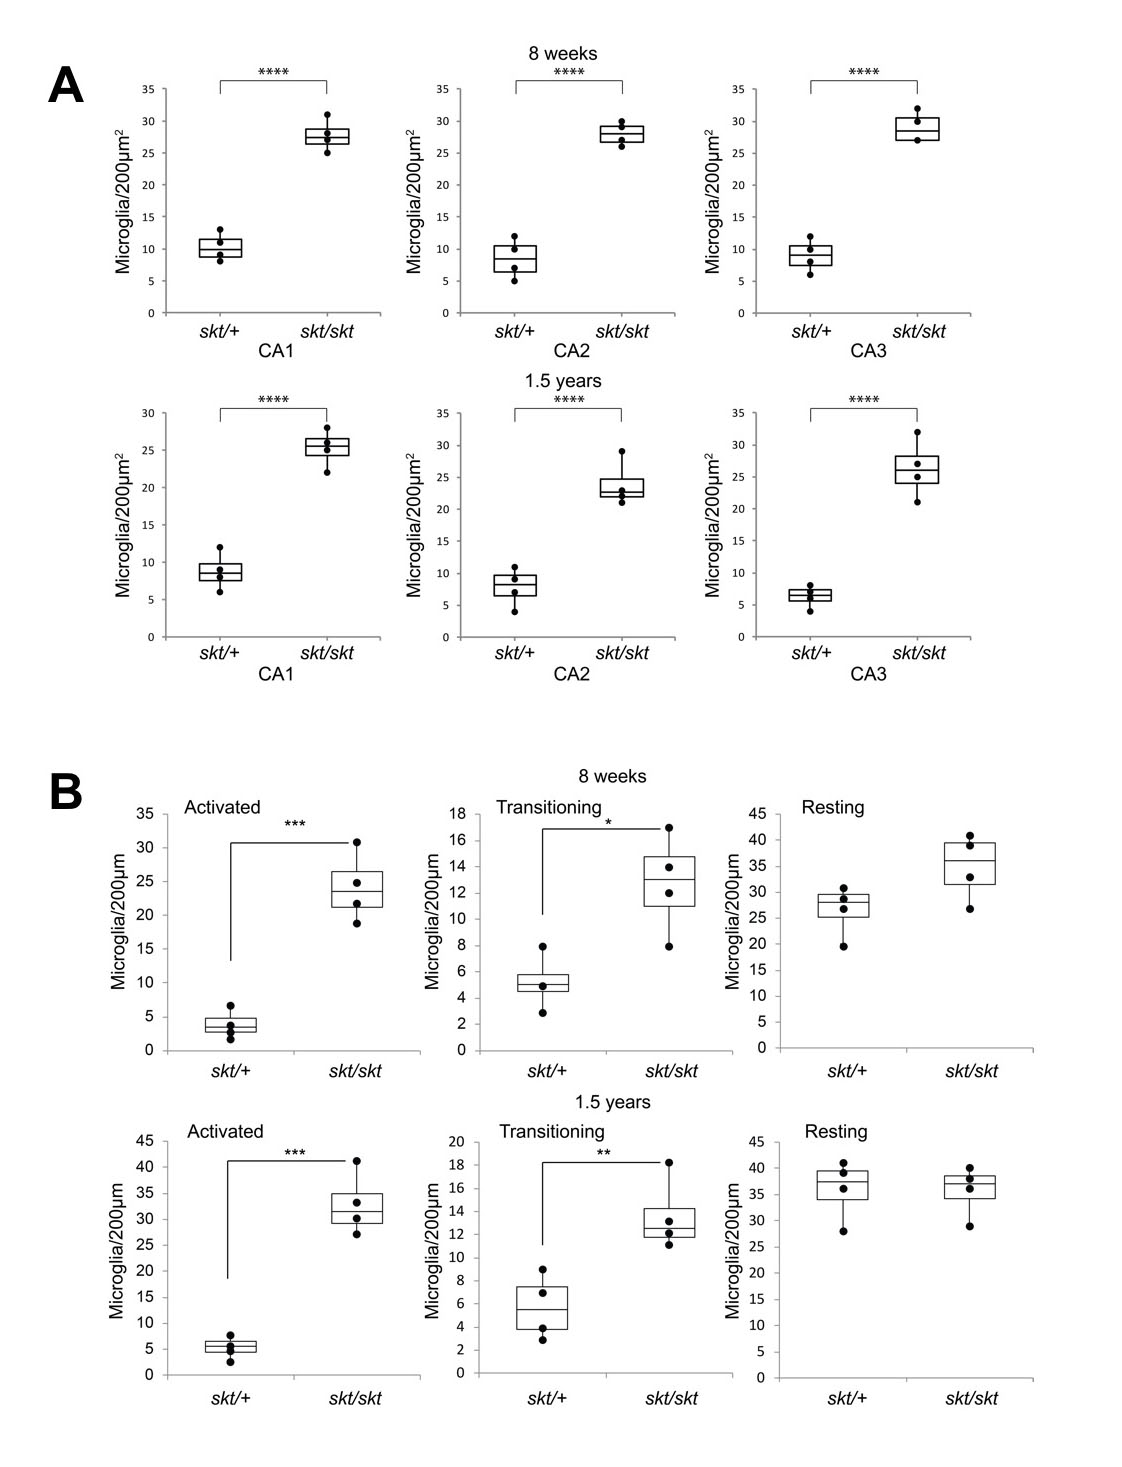


**Fig. S2.** (A) Quantification of Iba1+ cells in the CA1, CA2, CA3 regions of hippocampus in 8 week and 1.5 year old *skt* mice and heterozygous controls. (B) *skt*/*skt* mice show increased number of activated and transitioning microglia in the hippocampus compared to *skt*/+ control mice at 8 weeks and 1.5 year of age. **P<0.01, ***P<0.001, ****P<0.0001.

**
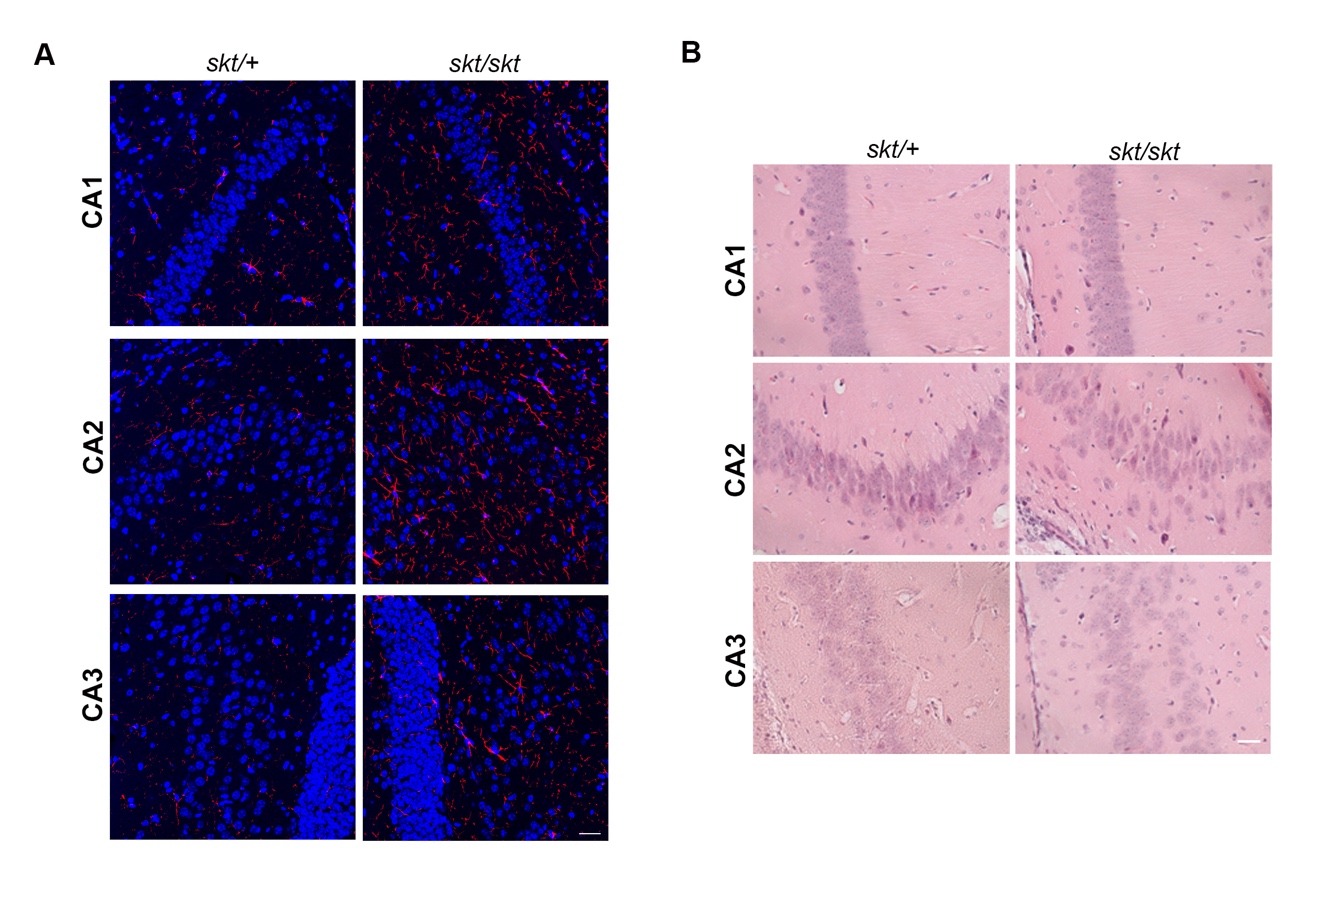
**

**Fig. S3.** (A) Microglia (Iba1, red) are increased in the *skt* brain at 8 weeks of age compared to heterozygous controls, visible in the CA1, CA2, and CA3 regions of the hippocampus. Sections are counter-stained with DAPI (blue). Scale bar = 10 μm. (B) H&E staining performed on brain sections from 8-week-old *skt* mice and heterozygous controls indicated no neurodegeneration in the CA1, CA2, CA3 regions of hippocampus. Scale bar = 10 μm.


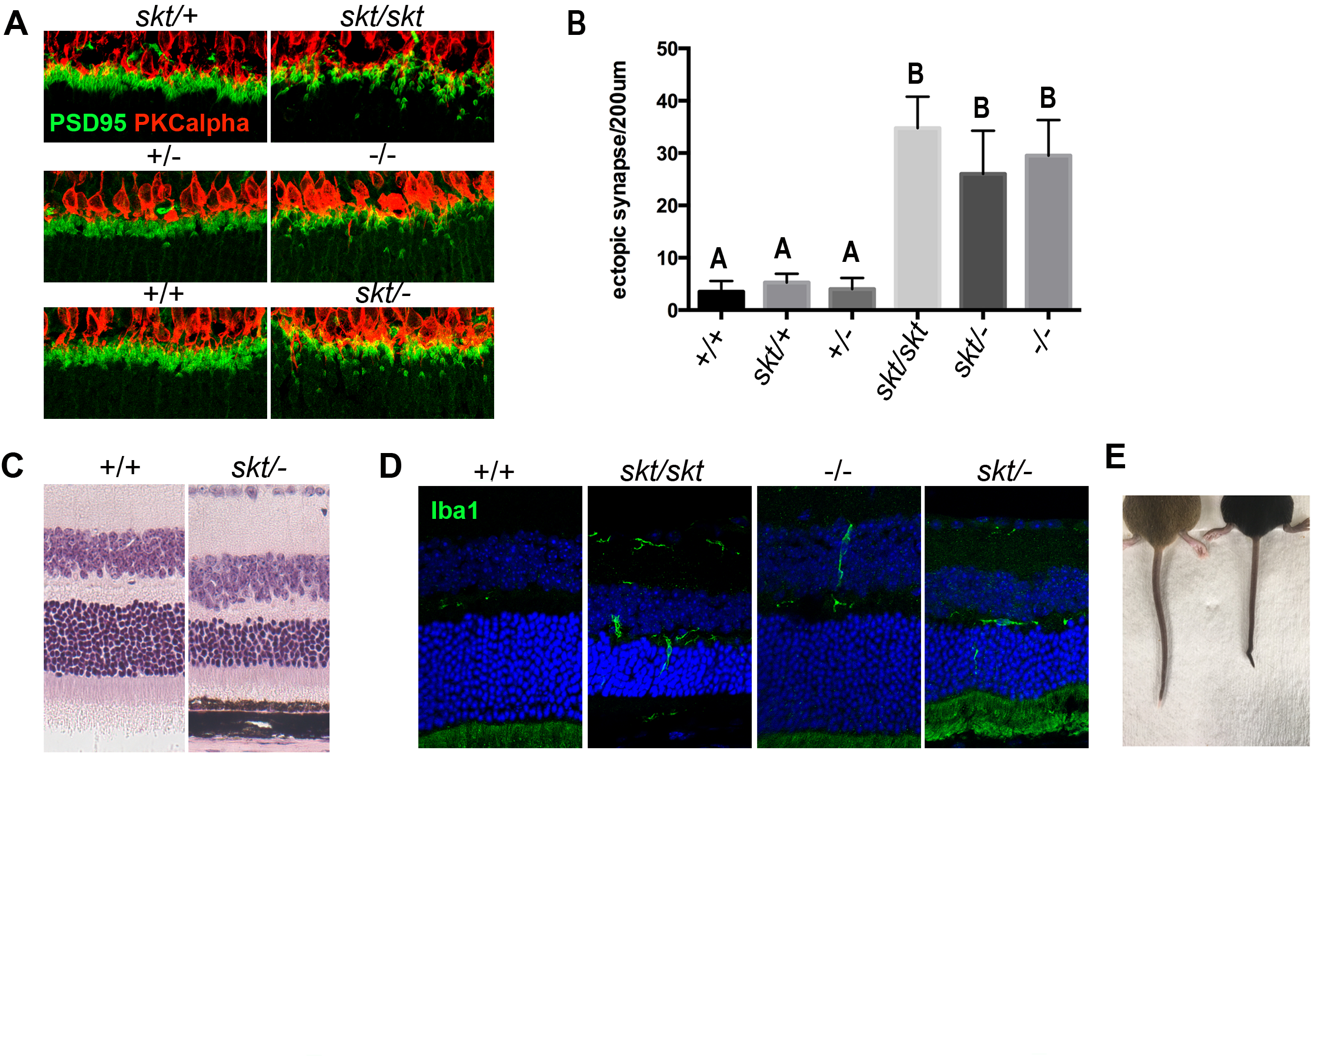


**Fig. S4.** A complementation test was performed using *Chsy1* KO mice. (A, B) Mice heterozygous for the *Chsy1* KO allele and the *skt* allele (*skt/-*), as well as homozygous *Chsy1* KO mice (-/-), exhibit an increased number of ectopically localized synapses compared to wild-type (+/+) and heterozygous controls (*skt/+*, *+/-*) (n=4 for each genotype). (C) Mice heterozygous for the *Chsy1* KO allele and the *skt* allele (*skt/-*) exhibit decreased ONL thickness, similar to homozygous *skt* mutants. (D) Homozygous *skt* mutants (*skt/skt*), *Chsy1* KO mice (-/-), and mice heterozygous for the *Chsy1* KO allele and the *skt* allele (*skt/-*)all exhibit an increase in microglia (Iba1, green) in the retina. Sections are counterstained with DAPI (blue). (E) *skt/-* mice (right) exhibit a kinked tail similar to homozygous *skt* mice.

**
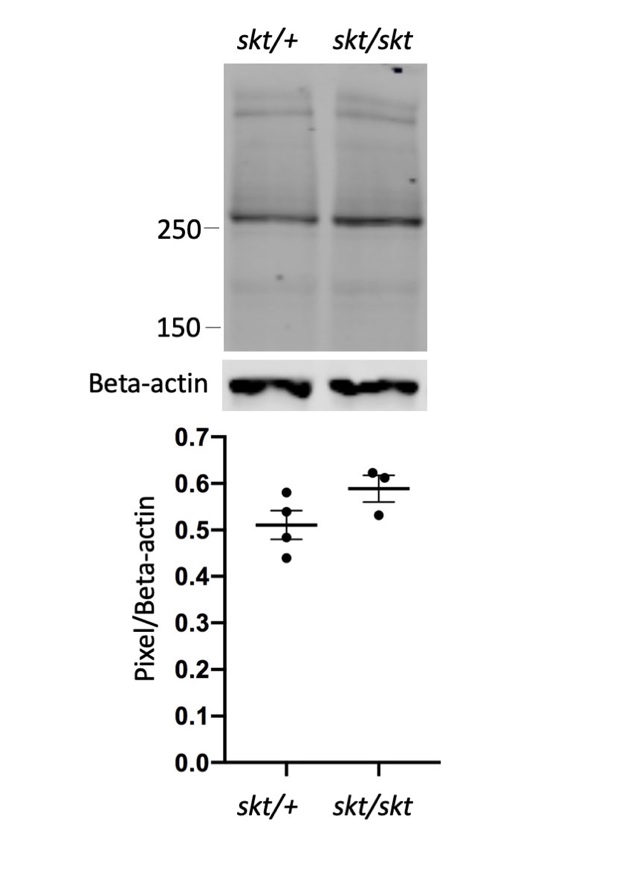
**

**Fig. S5.** Western blotting analysis of brain lysates from *Chsy1skt*/*skt*and heterozygous control mice using an antibody against the NG2 protein. Signal levels are expressed as normalized to the loading control, beta-actin, and do not show significant difference between *Chsy1skt*/*skt*and heterozygous control mice (p=0.1354 by t-test).


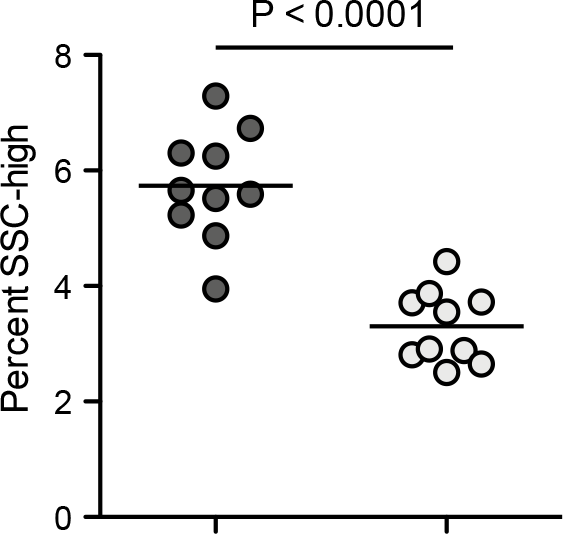

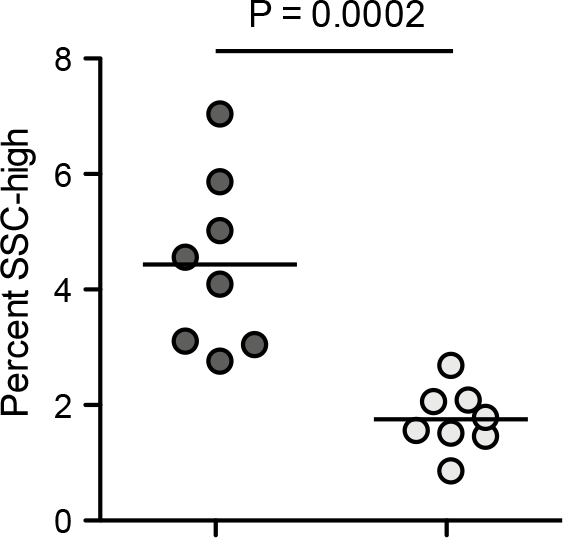


**Bone Marrow:**


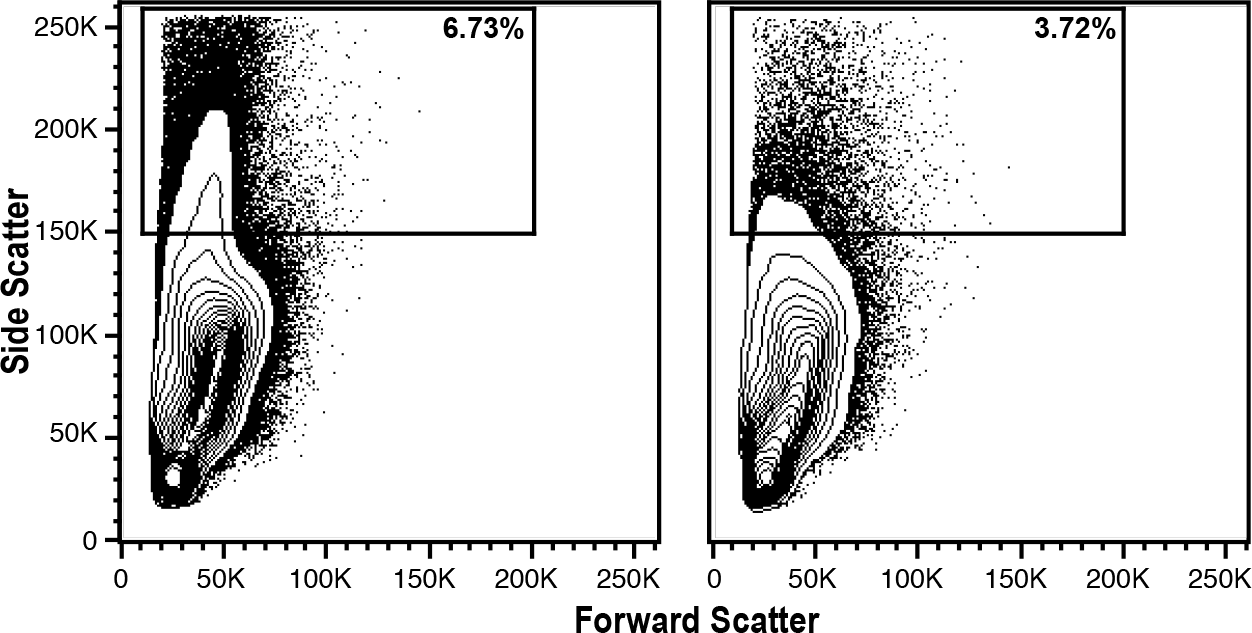


*skt/+*

*skt/skt*

*skt/+*

*skt/+*

*skt/skt*

*skt/skt*

**Spleen:**

*skt/+*


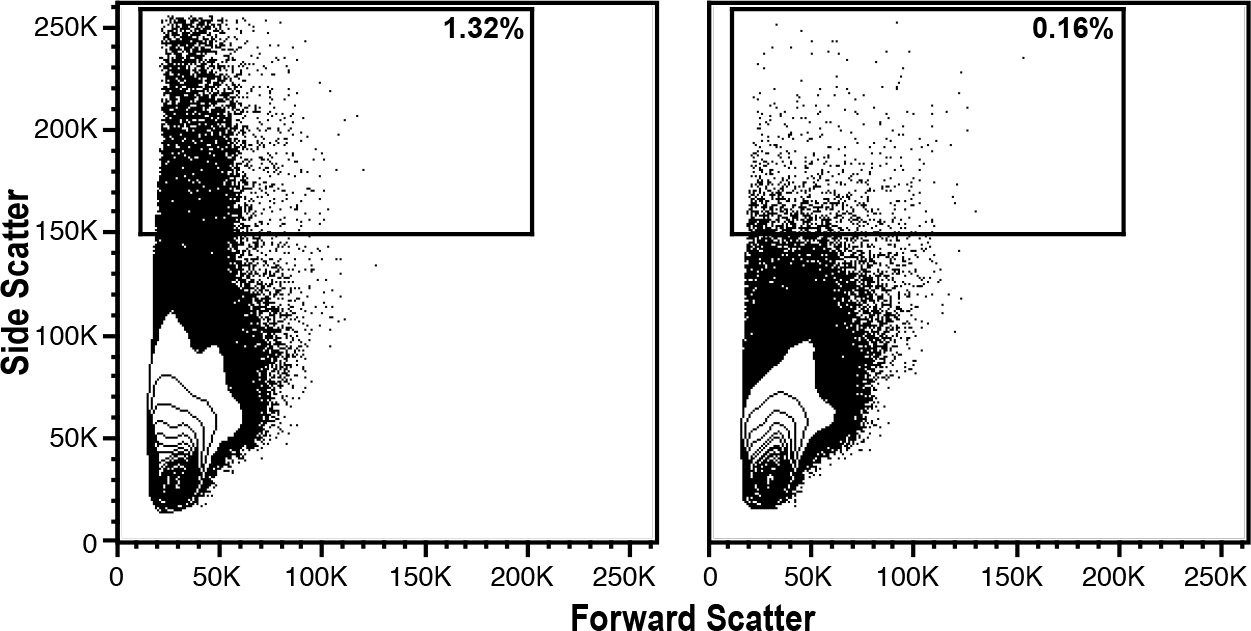


*skt/skt*

**Fig. S6.** Flow cytometric analysis of bone marrow (top panels) and spleen (bottom panels) samples of *Chsy1skt/skt* and heterozygous control (*Chsy1skt/+*) mice showing reduced frequencies of live cells with high side scatter.

**
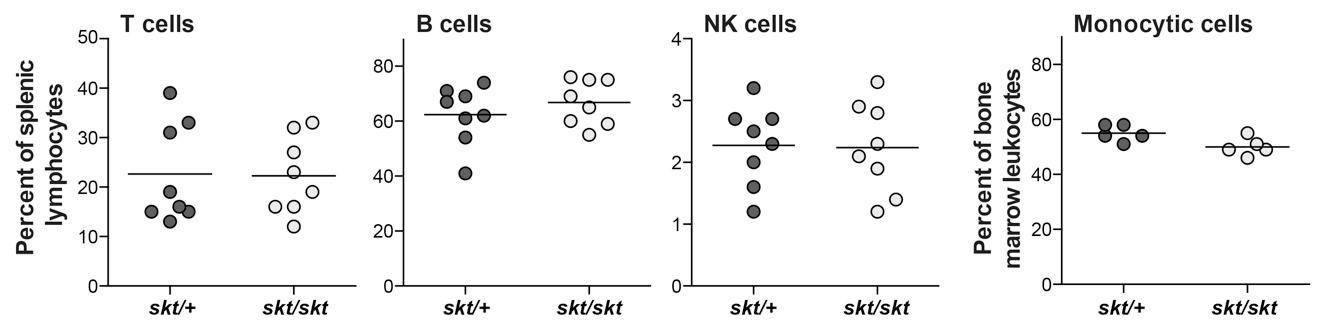
**

**Fig. S7.** Frequencies of T cells, B cells, and NK cells in spleen as well as monocytic cells in bone marrow did not appear to be consistently altered in *Chsy1skt/skt* mutants compared to heterozygous (*Chsy1skt/+*) controls. Antibodies against CD3 and CD19 were used to identify T cells and B cells, respectively, while CD49b and NKp46 antibodies were used to identify NK cells. Monocytic cells were identified as (CD11b+ SSCmed) subsets within the F4/80+ population.

Table S1. Antibodies used for immunohistochemistry, with source catalog numbers and dilutions.

| **Antibody** | **Species** | **Company** | **Catalog Num** | **Dilution used** |
| --- | --- | --- | --- | --- |
| PKC alpha | rabbit | Sigma | P4334 | 1:5000 |
| PSD95 (CL K28/43) | mouse | NeuroMab | 75-028 | 1:400 |
| Iba1 | rabbit | Wako | 019-19741 | 1:200 |
| GFAP | rabbit | Thermo | rb-087-A0 | 1:200 |
| WFS1 | rabbit | Protein Tech | 1158-1-AP | 1:300 |
| Chsy1 | rabbit | Atlas Antibodies | HPA048902 | 1:300 |
| CS GAG | mouse | Sigma-Aldrich | C8035 | 1:200 |
| Rhodopsin | mouse | Abcam | ab3267 | 1:200 |
| SLC16A1/MCT1 | rabbit | LSBio | LS-B14628 | 1:400 |
| NG2 | rabbit | Sigma-Aldrich | AB5320 | 1:200 |

**Table S2. Antibodies used for western blotting, with source catalog numbers and dilutions.**

| **Antibody** | **Species** | **Company** | **Catalog Num** | **Dilution used** |
| --- | --- | --- | --- | --- |
| CS GAG | mouse | Abcam | Ab11570 | 1:2000 |
| Aggrecan | rabbit | Millipore | AB1031 | 1:3000 |
| Versican | rabbit | Millipore | AB1033 | 1:1000 |
| Brevican | mouse | Millipore | MABN491 | 1:1000 |
| NG2 | rabbit | Abcam | ab129051 | 1:1000 |

**Table S3. Antibodies used for flow cytometry, with source catalog numbers and dilutions.**

| **Antibody** | **Company** | **Catalog Num** | **Dilution used** |
| --- | --- | --- | --- |
| CD3 | BD Bioscience | 561388 | 1:10 |
| CD19 | BD Bioscience | 557655 | 1:10 |
| Ly6G | BioLegend | 127608 | 1:10 |
| F4/80 | BioLegend | 123114 | 1:10 |
| CD11b | BD Bioscience | 557396 | 1:10 |
| CD335(NKp46) | BD Bioscience | 563455 | 1:10 |
| CD49b | BioLegend | 108918 | 1:10 |

**Table S4. SNPs and small INDELs present in *Chsy1skt* mutants**

| **Cord (mm10)** | **Ref** | **Alt** | **Ploid** | **Gene** | **Feature** |
| --- | --- | --- | --- | --- | --- |
| 64092396 | GTTTC | G | Homo | None | NA |
| 64319583 | TTCTA | T | Homo | Mtmr10 | intron |
| 64345120 | GCTTC | G | Homo | Pred.Gene. | intron |
| 64375009 | G | T | Homo | None | NA |
| 64469591 | T | A | Homo | Esox mcee | intron |
| 64469595 | A | G | Homo | Esox mcee | intron |
| 64469754 | C | G | Homo | Esox mcee | intron |
| 64469925 | T | C | Homo | Esox mcee | intron |
| 64472548 | A | C | Homo | Esox mcee | intron |
| 64473104 | A | C | Homo | Esox mcee | intron |
| 64494587 | T | C | Homo | Esox mcee | intron |
| 64508720 | GAGAC | G | Homo | Apba2 | intron |
| 64533388 | G | A | Homo | Apba2 | intron |
| 64567809 | T | TTTC | Homo | Apba2 | intron |
| 64814771 | AAG | A | Homo | Fam189a1 | intron |
| 65231722 | CTT | C | Homo | AK302665 | intron |
| 65398923 | G | A | Homo | Homo TJP1 | intron |
| 65410867 | AG | A | Homo | Homo TJP1 | intron |
| 65497018 | C | A | Homo | Homo TJP1 | intron |
| 65543588 | T | TCTTC | Homo | None | NA |
| 65673779 | CAAAAG | C | Homo | Tarsl2 | intron |
| 65863287 | TTC | T | Homo | Pcsk6 | intron |
| 65926646 | ATATC | A | Homo | Pcsk6 | intron |
| 66061001 | T | TTTTG | Homo | Snrpa1 | intron |
